# Supplementary material for: The King’s Lace Bug Recaredus rex Distant, 1909 (Hemiptera: Heteroptera: Tingidae): Systematic Position, First Palaearctic and Afrotropical Records, and Ecological Niche Modelling
Source: MDPI journal article supplement (doi:10.3390/insects13060558), 2022-06-19
Supplement: s1 [file s1]

Table S1

## VariableSelectionMaxAUCTest

| Test Model    | Contributions 1 | Correlation 1 | Contributions 2 | Correlation 2 | Contributions 3 | Correlation 3 |
|---------------|-----------------|---------------|-----------------|---------------|-----------------|---------------|
| bio10n        | 0               | NA            | NA              | NA            | NA              | NA            |
| bio11n        | 0               | NA            | NA              | NA            | NA              | NA            |
| bio12n        | 0               | NA            | NA              | NA            | NA              | NA            |
| bio13n        | 0               | NA            | NA              | NA            | NA              | NA            |
| bio14n        | 0.3061          | NA            | NA              | NA            | NA              | NA            |
| bio15n        | 0               | NA            | NA              | NA            | NA              | NA            |
| bio16n        | 0,0003          | NA            | NA              | NA            | NA              | NA            |
| bio17n        | 2.5050          | NA            | NA              | NA            | NA              | NA            |
| bio18n        | 0.0102          | NA            | NA              | NA            | NA              | NA            |
| bio19n        | 2.5748          | NA            | NA              | NA            | NA              | NA            |
| bio1n         | 0               | NA            | NA              | NA            | NA              | NA            |
| bio2n         | 0               | NA            | NA              | NA            | NA              | NA            |
| bio3n         | 0               | NA            | NA              | NA            | NA              | NA            |
| bio4n         | 0               | NA            | NA              | NA            | NA              | NA            |
| bio5n         | 0               | NA            | NA              | NA            | NA              | NA            |
| bio6n         | 0               | NA            | NA              | NA            | NA              | NA            |
| bio7n         | 0               | NA            | NA              | NA            | NA              | NA            |
| bio8n         | 0               | NA            | NA              | NA            | NA              | NA            |
| bio9n         | 0               | NA            | NA              | NA            | NA              | NA            |
| <b>elevn</b>  | NA              | NA            | 1.8548          | NA            | NA              | NA            |
| prec10n       | 0               | NA            | NA              | NA            | NA              | NA            |
| prec11n       | 1.4517          | NA            | NA              | NA            | NA              | NA            |
| prec12n       | 3.9054          | NA            | NA              | NA            | NA              | NA            |
| <b>prec1n</b> | 6.7313000       | 0.3920597     | 11.7256000      | 0.2544369     | 14.8851000      | 1.0000000     |
| prec2n        | 0.7889          | NA            | NA              | NA            | NA              | NA            |
| prec3n        | 0.1608          | NA            | NA              | NA            | NA              | NA            |
| prec4n        | 0               | NA            | NA              | NA            | NA              | NA            |
| prec5n        | 0               | NA            | NA              | NA            | NA              | NA            |
| <b>prec6n</b> | 19.4512000      | 0.4220510     | 34.4337000      | 1.0000000     | 8.6171000       | 0.2544369     |
| prec7n        | 0               | NA            | NA              | NA            | NA              | NA            |
| <b>prec8n</b> | 17.0887000      | 0.3438415     | 0.1007000       | NA            | NA              | NA            |
| prec9n        | 0               | NA            | NA              | NA            | NA              | NA            |
| srاد10n       | 0               | NA            | NA              | NA            | NA              | NA            |
| srاد11n       | 0               | NA            | NA              | NA            | NA              | NA            |
| srاد12n       | 0               | NA            | NA              | NA            | NA              | NA            |
| srاد1n        | 0               | NA            | NA              | NA            | NA              | NA            |
| srاد2n        | 0               | NA            | NA              | NA            | NA              | NA            |
| srاد3n        | 0               | NA            | NA              | NA            | NA              | NA            |
| srاد4n        | 10.0633000      | 0.9268476     | NA              | NA            | NA              | NA            |
| srاد5n        | 0.0041          | NA            | NA              | NA            | NA              | NA            |
| srاد6n        | 0               | NA            | NA              | NA            | NA              | NA            |
| srاد7n        | 0               | NA            | NA              | NA            | NA              | NA            |
| srاد8n        | 0               | NA            | NA              | NA            | NA              | NA            |
| srاد9n        | 0               | NA            | NA              | NA            | NA              | NA            |
| tavg10n       | 0               | NA            | NA              | NA            | NA              | NA            |
| tavg11n       | 0               | NA            | NA              | NA            | NA              | NA            |
| tavg12n       | 0               | NA            | NA              | NA            | NA              | NA            |
| tavg1n        | 0               | NA            | NA              | NA            | NA              | NA            |
| tavg2n        | 0               | NA            | NA              | NA            | NA              | NA            |
| tavg3n        | 0               | NA            | NA              | NA            | NA              | NA            |
| tavg4n        | 0               | NA            | NA              | NA            | NA              | NA            |
| tavg5n        | 0               | NA            | NA              | NA            | NA              | NA            |
| tavg6n        | 0               | NA            | NA              | NA            | NA              | NA            |

# VariableSelectionMaxAUCTest

|               |                   |                  |                   |                  |                   |                  |
|---------------|-------------------|------------------|-------------------|------------------|-------------------|------------------|
| tavg7n        | 0                 | NA               | NA                | NA               | NA                | NA               |
| tavg8n        | 0                 | NA               | NA                | NA               | NA                | NA               |
| tavg9n        | 0                 | NA               | NA                | NA               | NA                | NA               |
| tmax10n       | 0                 | NA               | NA                | NA               | NA                | NA               |
| tmax11n       | 0                 | NA               | NA                | NA               | NA                | NA               |
| tmax12n       | 0                 | NA               | NA                | NA               | NA                | NA               |
| tmax1n        | 0                 | NA               | NA                | NA               | NA                | NA               |
| tmax2n        | 0                 | NA               | NA                | NA               | NA                | NA               |
| tmax3n        | 0                 | NA               | NA                | NA               | NA                | NA               |
| tmax4n        | 0                 | NA               | NA                | NA               | NA                | NA               |
| tmax5n        | 0                 | NA               | NA                | NA               | NA                | NA               |
| tmax6n        | 0                 | NA               | NA                | NA               | NA                | NA               |
| tmax7n        | 0                 | NA               | NA                | NA               | NA                | NA               |
| tmax8n        | 0                 | NA               | NA                | NA               | NA                | NA               |
| tmax9n        | 0                 | NA               | NA                | NA               | NA                | NA               |
| tmin10n       | 0.0012            | NA               | NA                | NA               | NA                | NA               |
| tmin11n       | 0                 | NA               | NA                | NA               | NA                | NA               |
| tmin12n       | 0                 | NA               | NA                | NA               | NA                | NA               |
| tmin1n        | 0                 | NA               | NA                | NA               | NA                | NA               |
| tmin2n        | 0                 | NA               | NA                | NA               | NA                | NA               |
| tmin3n        | 0                 | NA               | NA                | NA               | NA                | NA               |
| tmin4n        | 4.6893000         | NA               | NA                | NA               | NA                | NA               |
| tmin5n        | 0.6723            | NA               | NA                | NA               | NA                | NA               |
| tmin6n        | 0                 | NA               | NA                | NA               | NA                | NA               |
| tmin7n        | 0                 | NA               | NA                | NA               | NA                | NA               |
| tmin8n        | 1.184             | NA               | NA                | NA               | NA                | NA               |
| <b>tmin9n</b> | <b>26.5566000</b> | <b>1.0000000</b> | <b>53.7401000</b> | <b>0.4220510</b> | <b>76.4977000</b> | <b>0.3920597</b> |
